# Supplementary material
Source: PubMed Central journal article supplement (PMC2877281)

Supplemental Figure 1

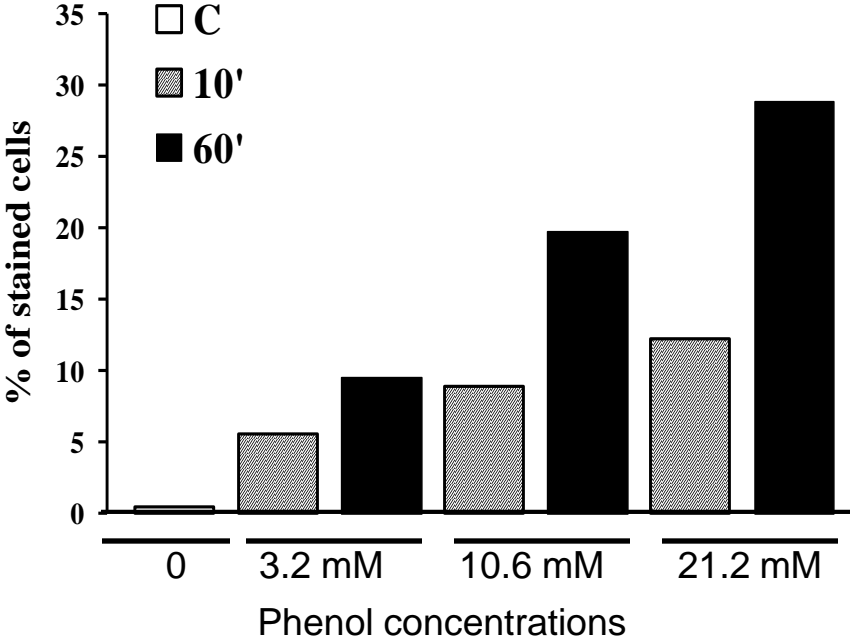

Supplement: NIHMS191635-supplement-Supp_Fig_1.pdf [file NIHMS191635-supplement-Supp_Fig_1.pdf]
